# Supplementary material
Source: MDPI journal article supplement (https://www.mdpi.com/2218-0532/90/4/61)
Supplement: s1 [file s1]

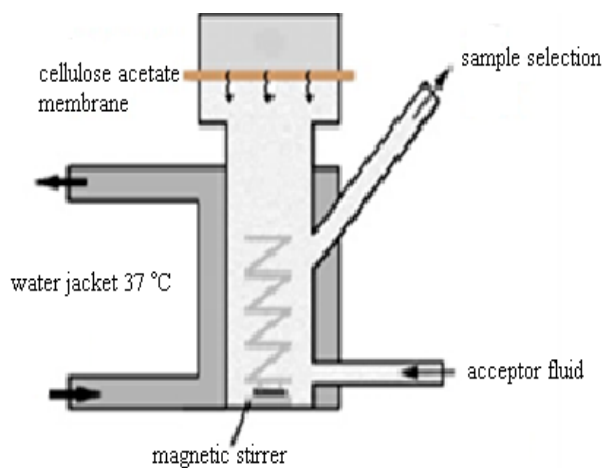

**Figure S1.** Schematic design of vertical Franz diffusion cell. Cell volume was equal to 12.65 mL and 4.35 mL for analysis of ZnO NPs and Xym, respectively.

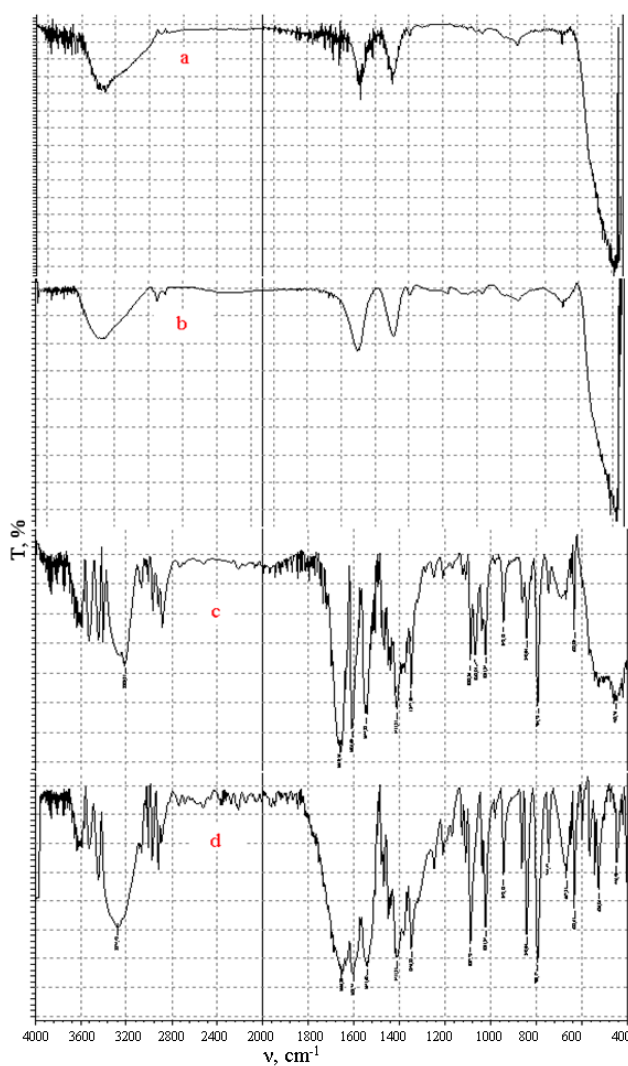

**Figure S2.** FTIR spectra of ZnO NPs (a), ZnO NPs-PEG (b), ZnO NPs-Xym (c), and xymedone (d)

**Table S1.** Data of powder XRD patterns of ZnO NPs, ZnO NPs-PEG, ZnO NPs-Xym, and xymedone.

| Substance   | Peaks            | $2\theta, ^\circ$ * | Average size (D), nm ** |
|-------------|------------------|---------------------|-------------------------|
| ZnO NPs     | 100              | 32.02               | 16.64                   |
|             | 002              | 34.48               |                         |
|             | 101              | 36.76               |                         |
|             | 102              | 47.68               |                         |
|             | 110              | 56.41               |                         |
| ZnO NPs-PEG | 100              | 31.37               | 17.16                   |
|             | 002              | 33.87               |                         |
|             | 101              | 35.31               |                         |
|             | 102              | 46.23               |                         |
|             | 110              | 56.42               |                         |
| ZnO NPs-Xym | Xym <sub>1</sub> | 12.66               | 16.20                   |
|             | Xym <sub>2</sub> | 14.74               |                         |
|             | Xym <sub>3</sub> | 19.78               |                         |
|             | Xym <sub>4</sub> | 23.68               |                         |
|             | Xym <sub>5</sub> | 29.21               |                         |
|             | 100              | 31.68               |                         |
|             | 002              | 34.28               |                         |
|             | 101              | 36.08               |                         |
|             | Xym <sub>6</sub> | 37.94               |                         |
|             | Xym <sub>7</sub> | 44.16               |                         |
|             | 102              | 47.48               |                         |
|             | 110              | 56.32               |                         |
|             |                  |                     |                         |
| Xym         | Xym <sub>1</sub> | 13.12               | —                       |
|             | Xym <sub>2</sub> | 14.84               |                         |
|             | Xym <sub>3</sub> | 19.86               |                         |
|             | Xym <sub>4</sub> | 24.08               |                         |
|             | Xym <sub>5</sub> | 30.76               |                         |
|             | Xym <sub>6</sub> | 37.41               |                         |
|             | Xym <sub>7</sub> | 44.26               |                         |

\* $2\theta$  – Bragg angle.

\*\* Calculated by Sherrer's equation.

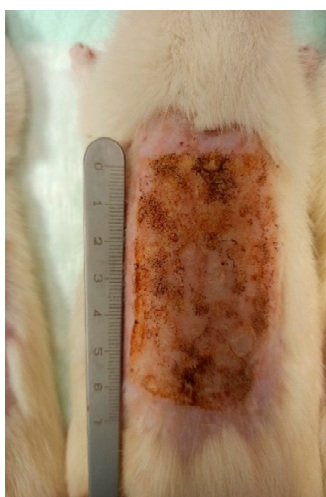

Burn (untreated) 0 Day

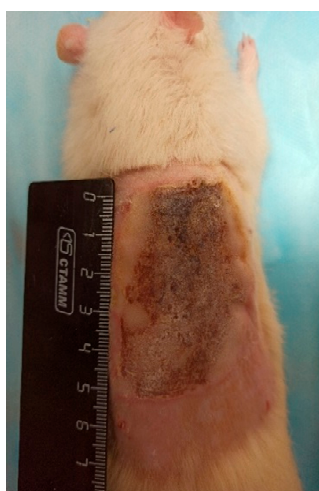

ZnO NPs gel 3 Day

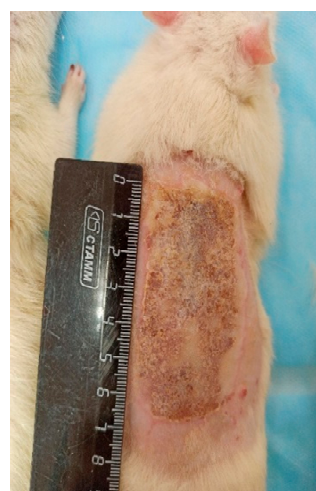

ZnO NPs gel 7 Day

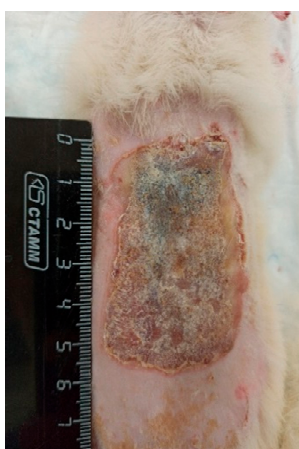

ZnO NPs gel 10 Day

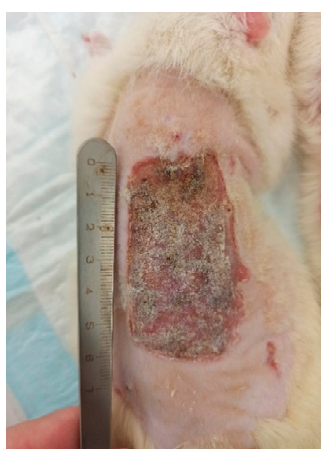

ZnO NPs gel 10 Day

**Figure S3.** Photo-images of burn wound on rats under the treatment by ZnO NPs gel for 3,7,10 Days.

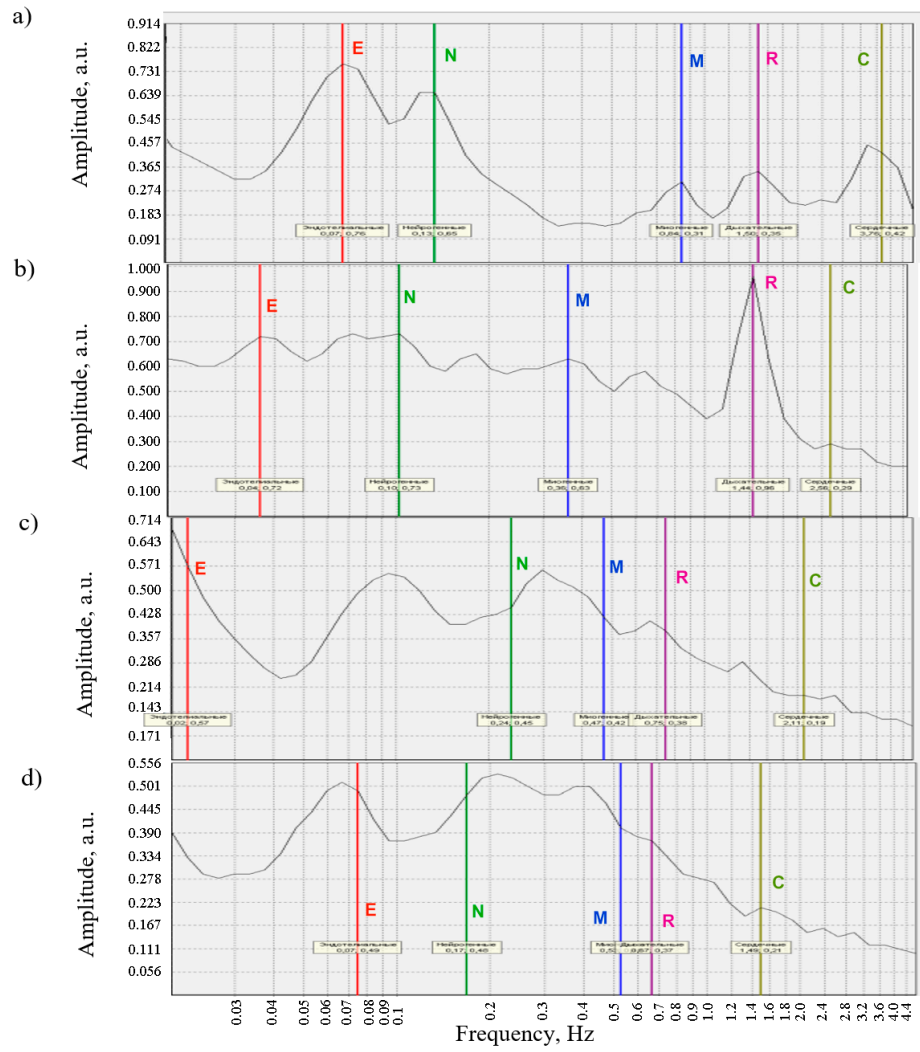

**Figure S4.** Wavelet-LDF spectra (Amplitude =  $f(\text{Frequency})$ ) obtained by laser Doppler flowmetry for intact rats (a), untreated burnt rats (day 0, b), burnt rats (day 10) under the treatment by ZnO NPs-Xym gel (c) and Methyluracyl® ointment (d). Neurogenic (N), myogenic (M), cardiac (C), endothelial (E), and respiratory (R) bands are presented on spectra.
